# Supplementary material
Source: Springer Nature journal article supplement (https://www.springermedizin.de/resource/supplementary/12958_2004_199_MOESM5_ESM.pdf/9567356)

Manual score

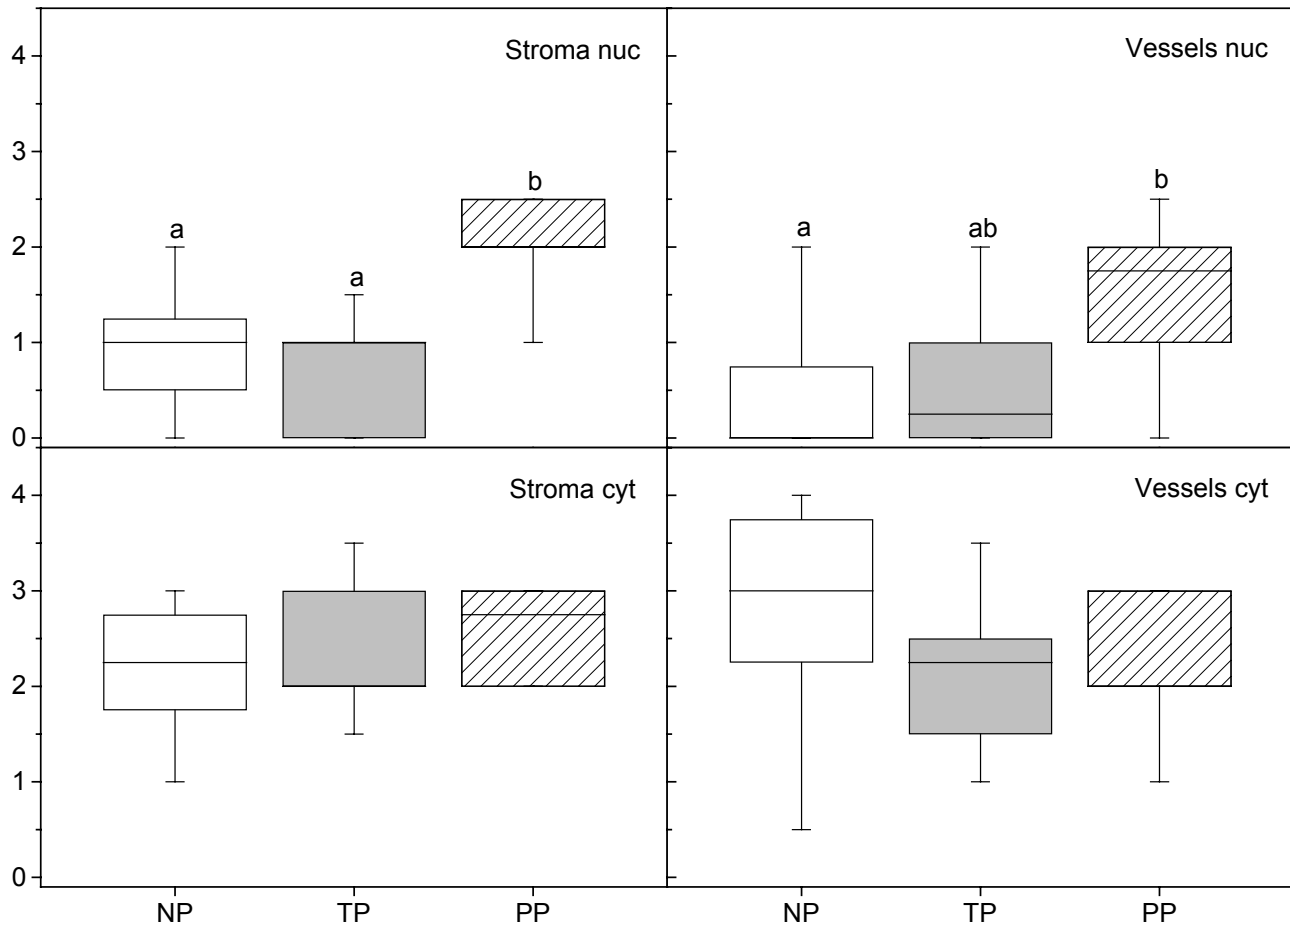

Supplement: MOESM5 [file 9567356]
